# Supplementary material for: BOA/DHB/Na: An Efficient UV-MALDI Matrix for High-Sensitivity and Auto-Tagging Glycomics
Source: MDPI journal article supplement (doi:10.3390/ijms232012510), 2022-10-19
Supplement: s1 [file s1]

## Supplementary Materials

# BOA/DHB/Na: an Efficient UV-MALDI Matrix for High-Sensitivity and Auto-Tagging Glycomics

Erina Barada, Hiroshi Hinou\*

Graduate School of Life Science and Faculty of Advanced Life Science, Frontier Research Center for Advanced Material and Life Science, Hokkaido University, N21W11, Sapporo 001-0021, Japan.

\*e-mail: hinou@sci.hokudai.ac.jp

### List of contents

**Figure S1.** Chemical structure of sodium adduct ion of SGP-10 and its oxime and imine form.

**Figure S2.** Morphological differences in each matrix system (analyte is SGP-10)

**Figure S3.** MALDI-TOFMS spectra of SGP-10 in (a) BOA/DHB/Na matrix and (b) BOA HCl/DHB/Na matrix after overnight incubation at room temperature.

**Figure S4.** MALDI-TOFMS spectra of SGP-10 in (a) BOADHB/Na matrix and (b) aniline/DHB/Na matrix after overnight incubation at room temperature.

**Figure S5.** Enlarged view of the main peak area in Figure 4b.

**Figure S6.** Supporting data of Figure 5.

**Figure S7.** MALDI-TOF/TOF MS fragmentation patterns of SGP-10 with four different matrix system.

**Figure S8.** Bar chart showing the amount of the top ten *O*-linked glycans in MPS (among five lots) analyzed with BOA/DHB/Na matrix.

**Figure S9.** Morphological differences of each matrix system used for profiling of *O*-glycan from MPS.

**Figure S10.** MALDI-TOFMS spectra from MPS by the workflow in Scheme 1 (with BOA/DHB/Na matrix).

**Figure S11.** MALDI-TOFMS spectra of the Cotton HILIC eluate from MPS by the workflow in Scheme 1 with DHB/Na matrix.

**Figure S12.** MALDI-TOFMS spectra of the Cotton HILIC eluate from MPS by the workflow in Scheme 1 with DHB (0.1% TFA) matrix.

**Table S1.** List of the composition of *O*-glycans assigned by GlycoMod for twenty peaks (*m/z*) detected from MPS by the workflow in Scheme 1.

**Table S2.** Amount list of the twenty *O*-glycans detected from MPS by the workflow in Scheme 1.

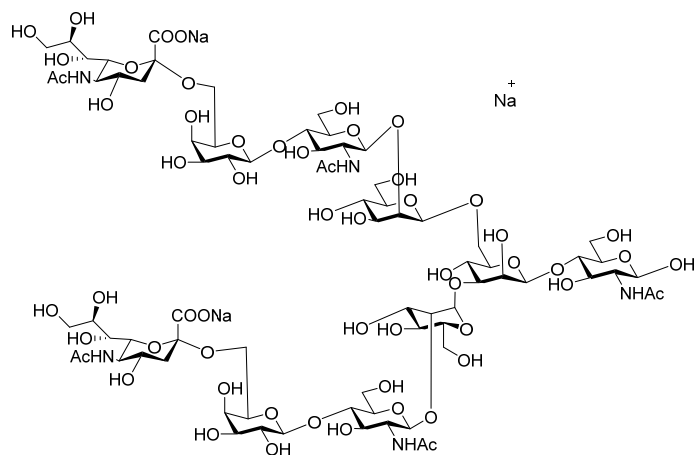

**SGP-10** [(M-2H+3Na)<sup>+</sup> = 2087]

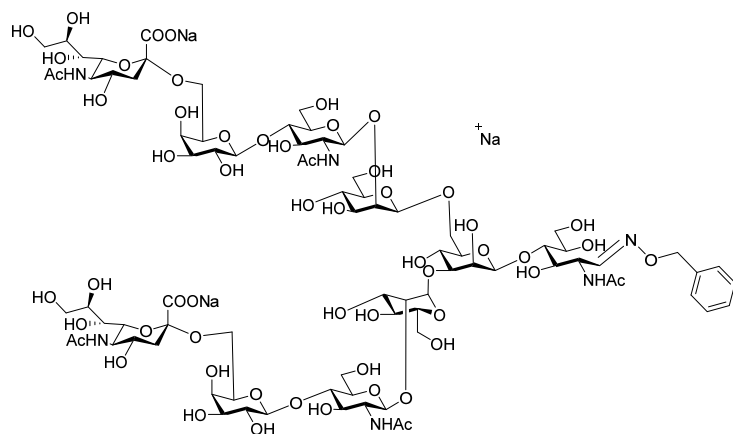

**SGP-10-BOA** [(M-2H+BOA+3Na)<sup>+</sup> = 2192]

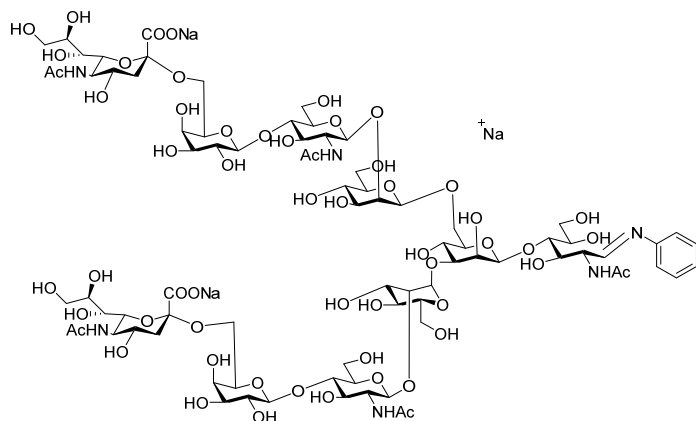

**SGP-10-Aniline** [(M-2H+Aniline+3Na)<sup>+</sup> = 2162]

**Figure S1.** Chemical structure of sodium adduct ion of SGP-10 and its oxime and imine form.

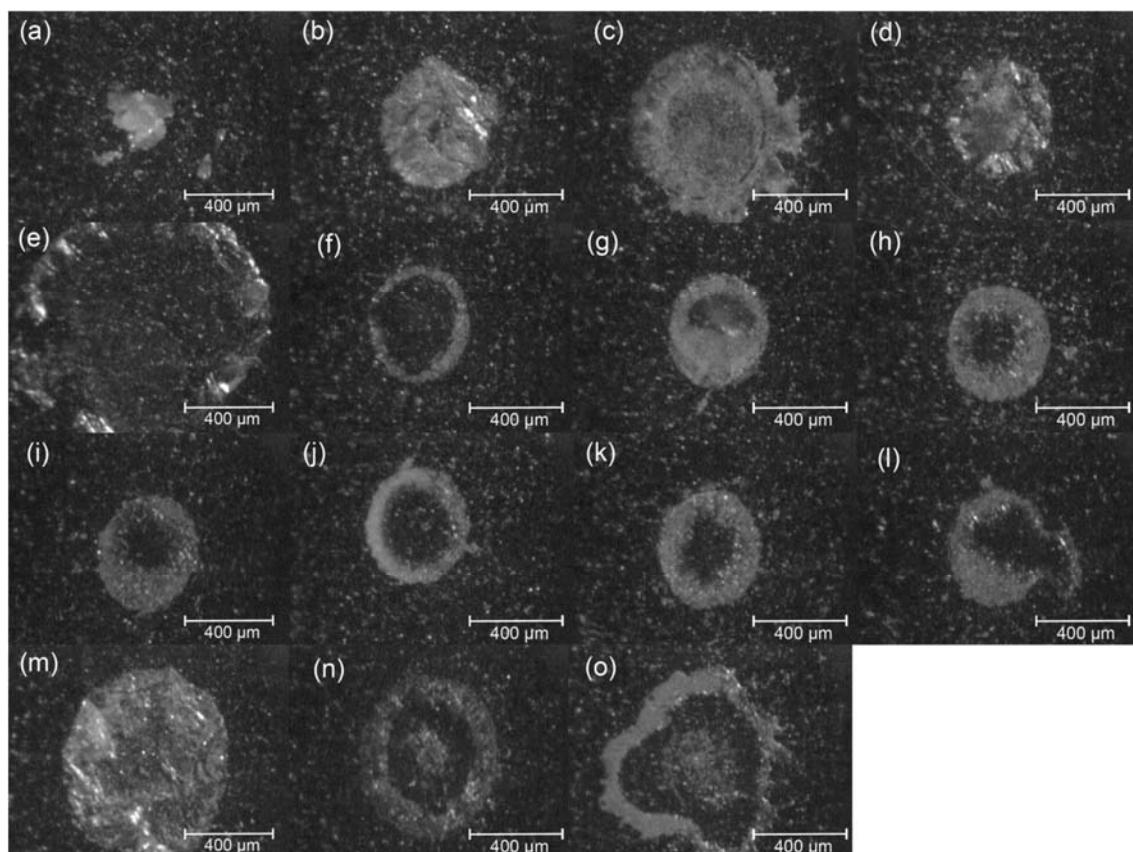

**Figure S2.** Morphological differences in each matrix system (analyte is SGP-10); (a) BOA/DHB/Na matrix (dried overnight at room temperature), (b) BOA HCl/DHB/Na matrix (dried overnight at room temperature), (c) aniline/DHB/Na matrix (dried overnight at room temperature), (d) NMA/DHB/Na matrix (dried overnight at room temperature), (e) DHB (0.1% TFA) (dried with hairdryer), (f) BOA/DHB/Na matrix (dried 1 hour at room temperature), (g) BOA/DHB/Na matrix (dried 3 hour at room temperature), (h) BOA/DHB/Na matrix (dried 1 hour at 60°C), (i) BOA/DHB/Na matrix (dried 1 hour at 50°C), (j) BOA/DHB/Na matrix (dried 1 hour at 40°C), (k) BOA/DHB/Na matrix (dried 30 minutes at 60°C), (l) BOA/DHB/Na matrix (dried 30 minutes at 50°C), (m) BOA HCl/DHB/Na matrix (dried 1 hour at 60°C), (n) aniline/DHB/Na matrix (dried 1 hour at 60°C), (o) NMA/DHB/Na matrix (dried 1 hour at 60°C).

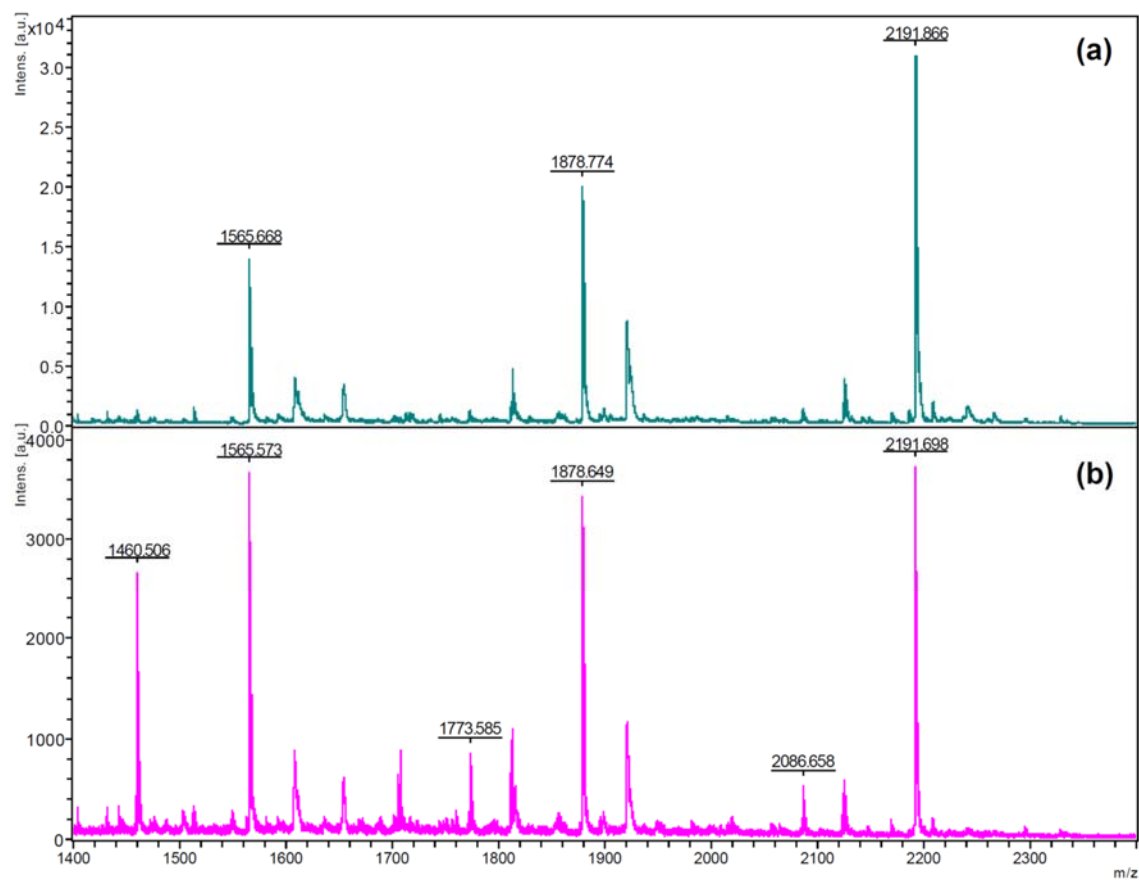

**Figure S3.** MALDI-TOFMS spectra of SGP-10 in (a) BOA/DHB/Na matrix and (b) BOA HCl/DHB/Na matrix after overnight incubation at room temperature.

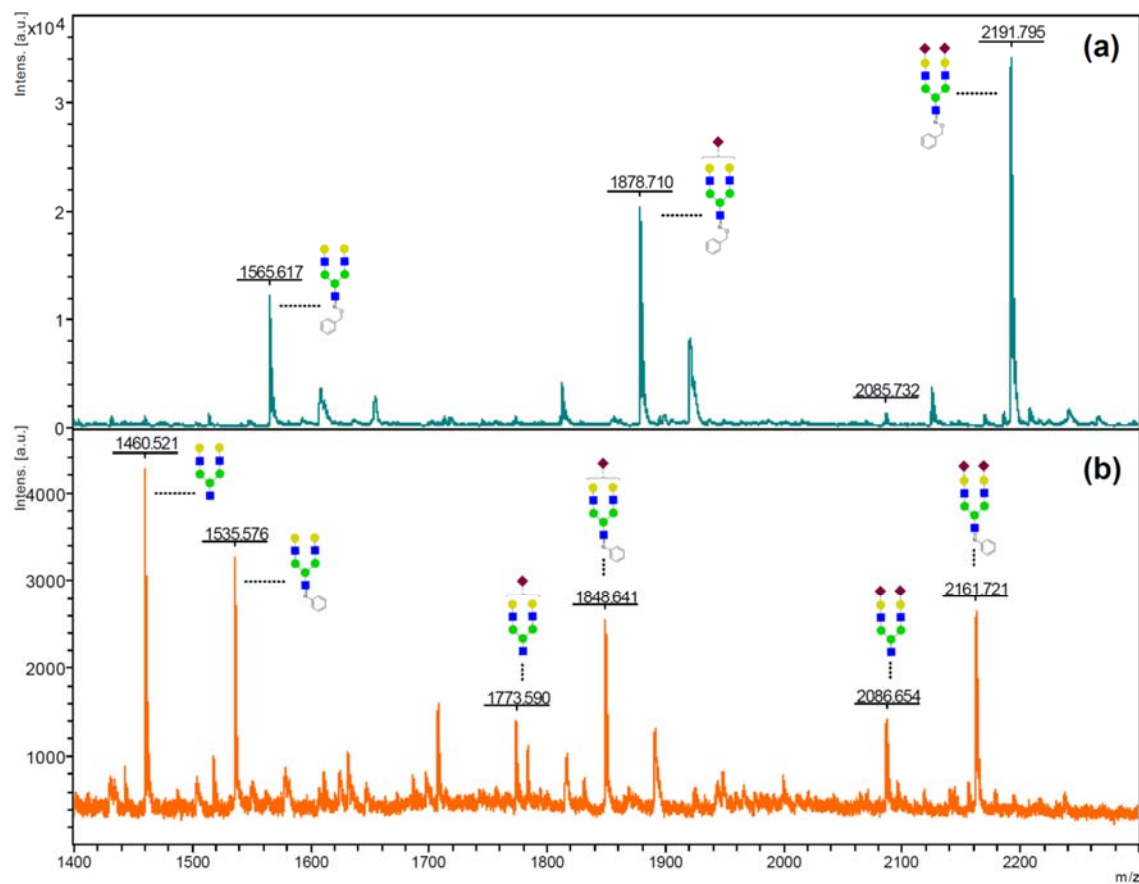

**Figure S4.** MALDI-TOFMS spectra of SGP-10 in (a) BOA/DHB/Na matrix and (b) aniline/DHB/Na matrix after overnight incubation at room temperature.

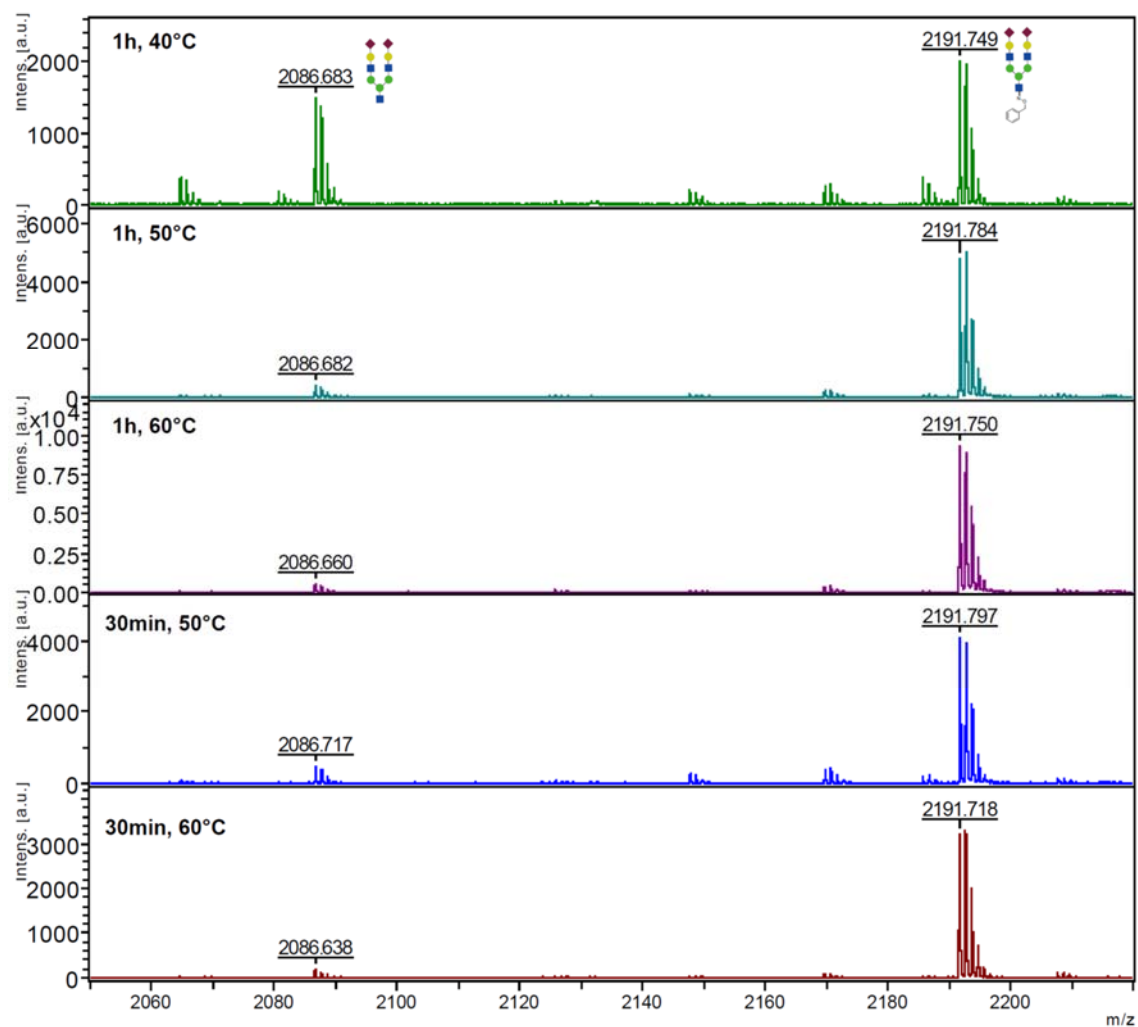

**Figure S5.** Enlarged view of the main peak area in Figure 4b.

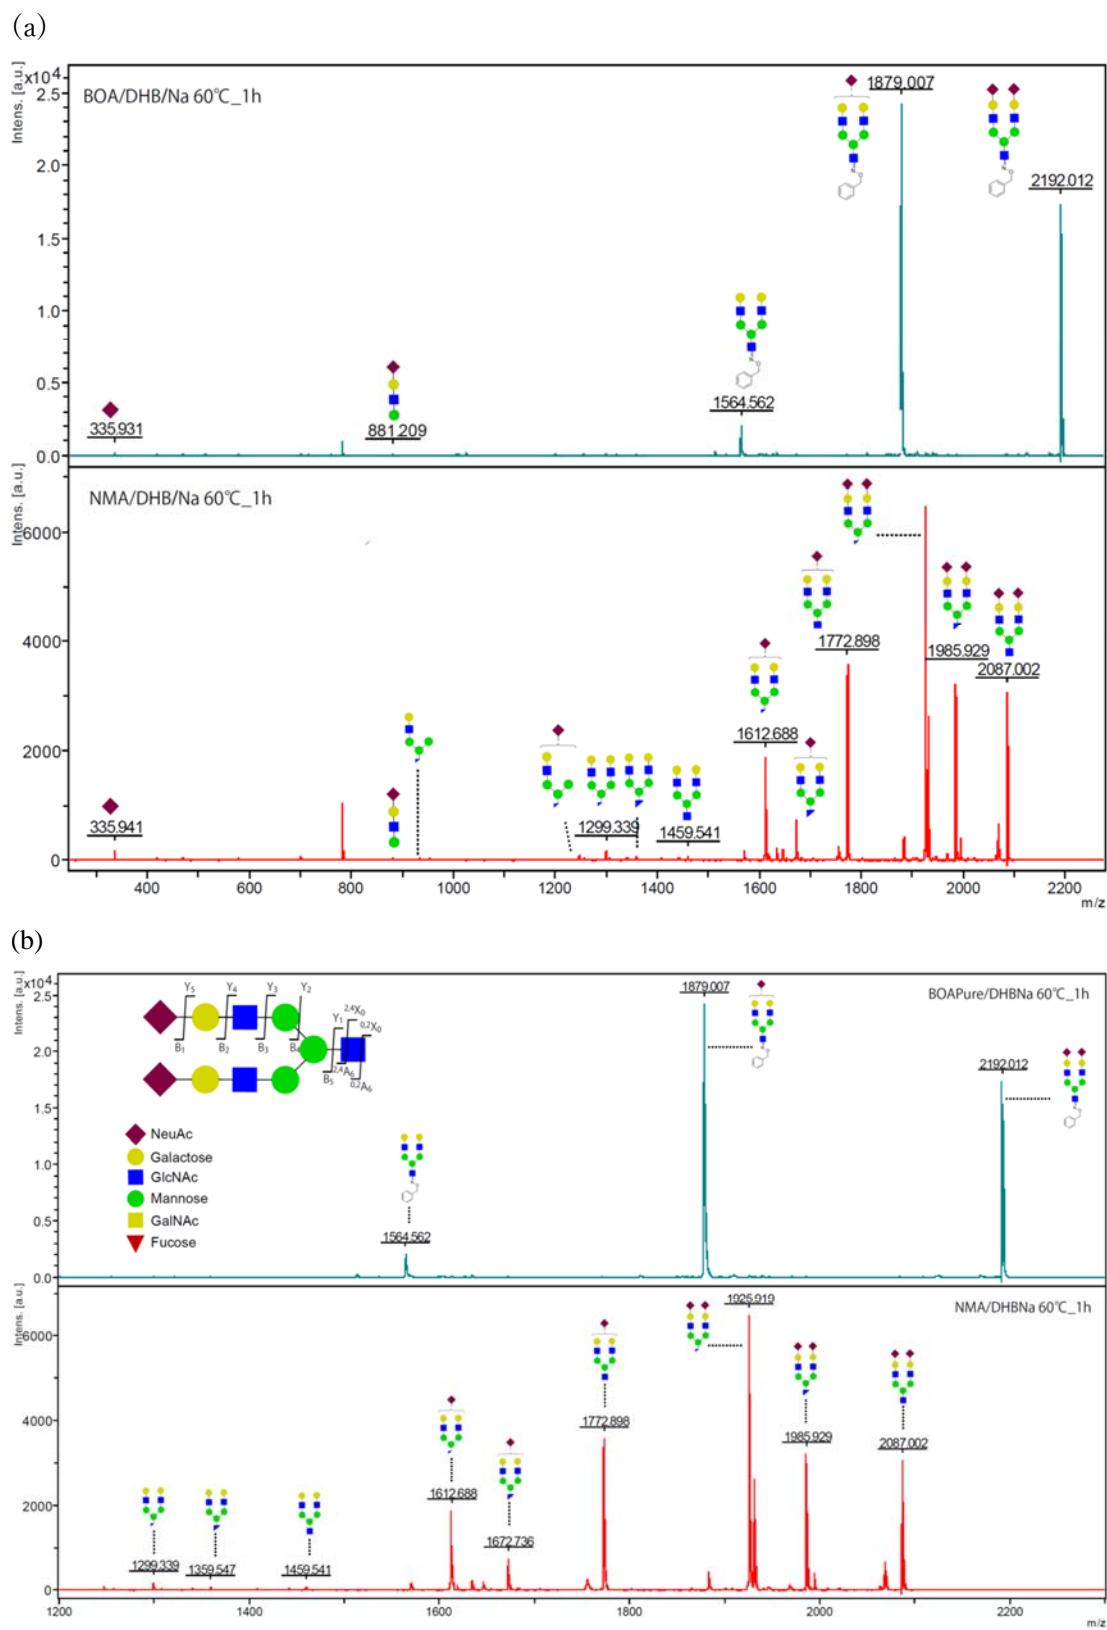

**Figure S6.** Supporting data of Figure 5; (a) Peak picked spectrum, (b) enlarged view of the main peak area in Figure 5.

(a)

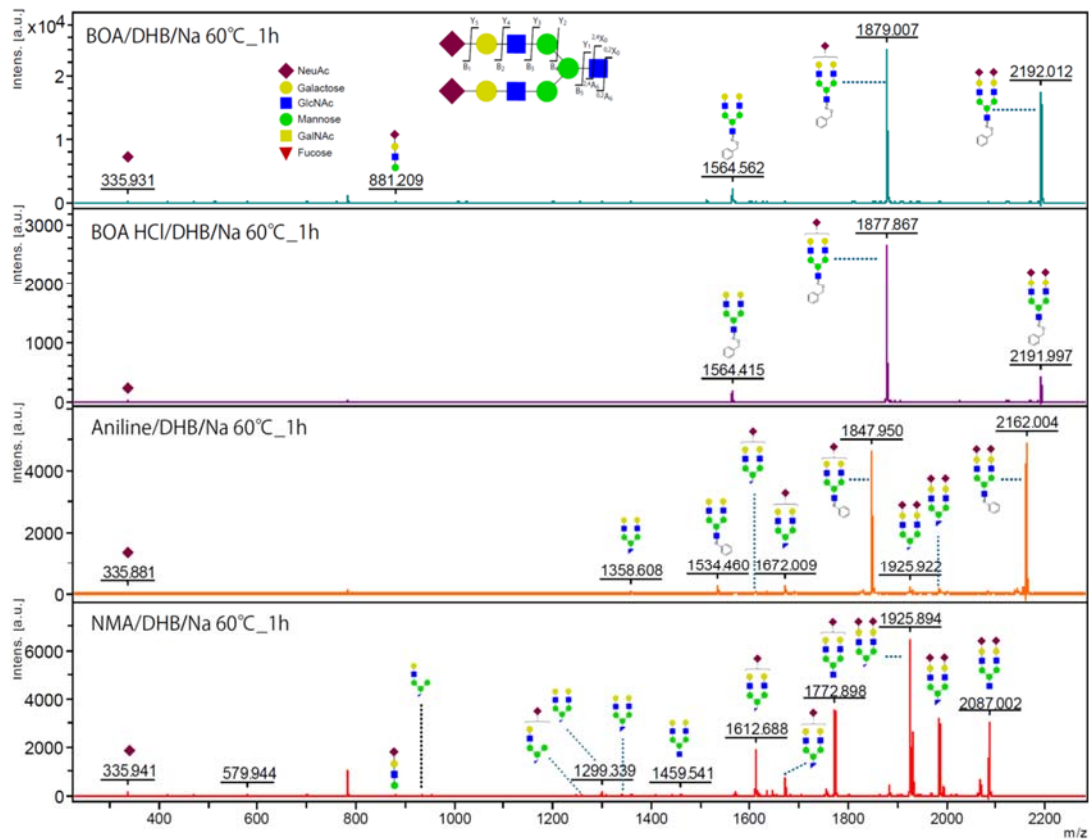

(b)

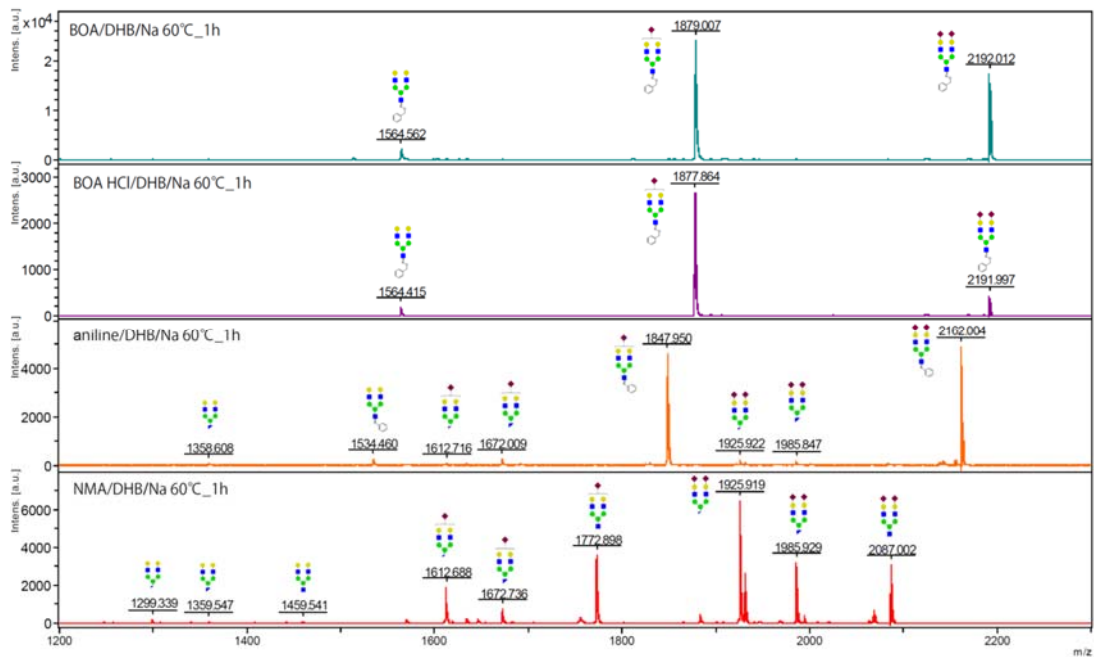

**Figure S7.** MALDI-TOF/TOF MS fragmentation patterns of SGP-10 with four different matrix system; (a)  $m/z$  200-2300, (b)  $m/z$  1200-2300.



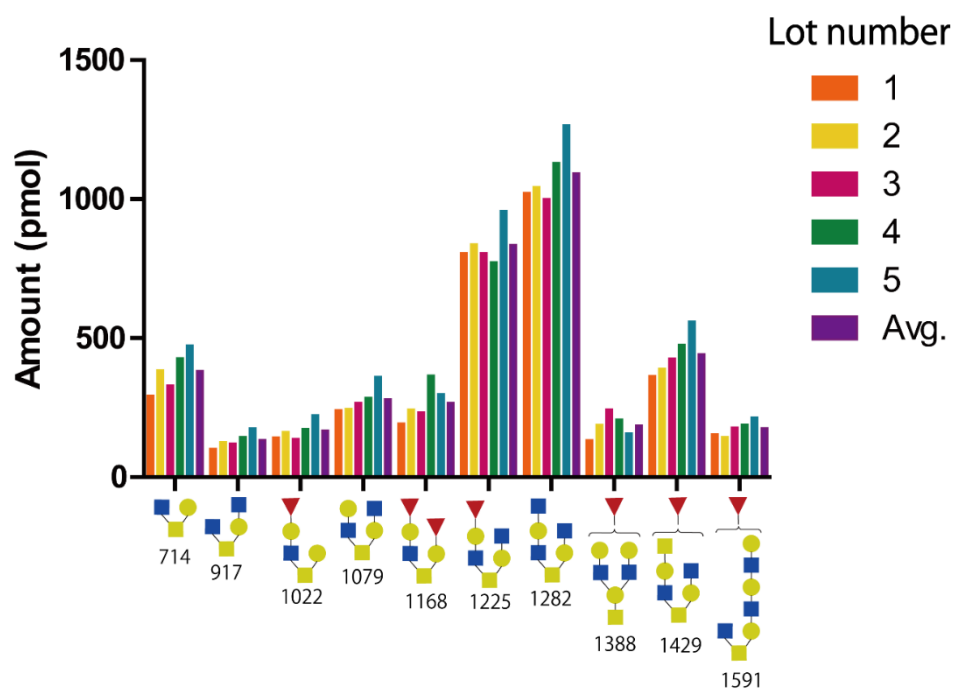

**Figure S8.** Bar chart showing the amount of the top ten *O*-linked glycans in MPS (among five lots) analyzed with BOA/DHB/Na matrix.

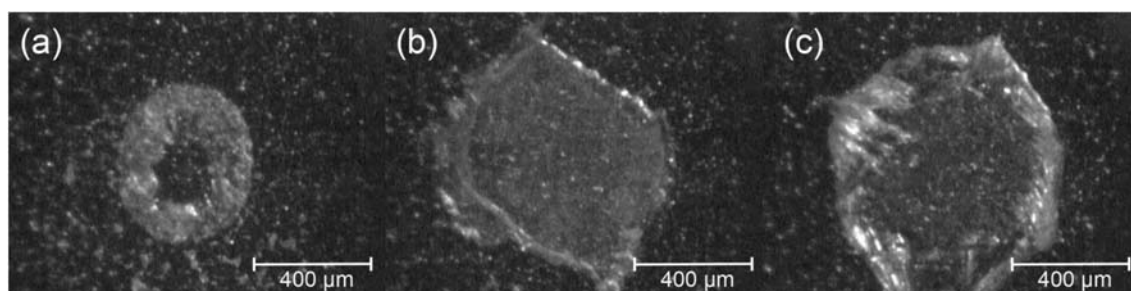

**Figure S9.** Morphological differences of each matrix system used for profiling of *O*-glycan from MPS; (a) BOA/DHB/Na matrix (dried 1 hour at 60°C), (b) DHB/Na matrix (dried with hairdryer), (c) DHB (0.1% TFA) (dried with hairdryer).

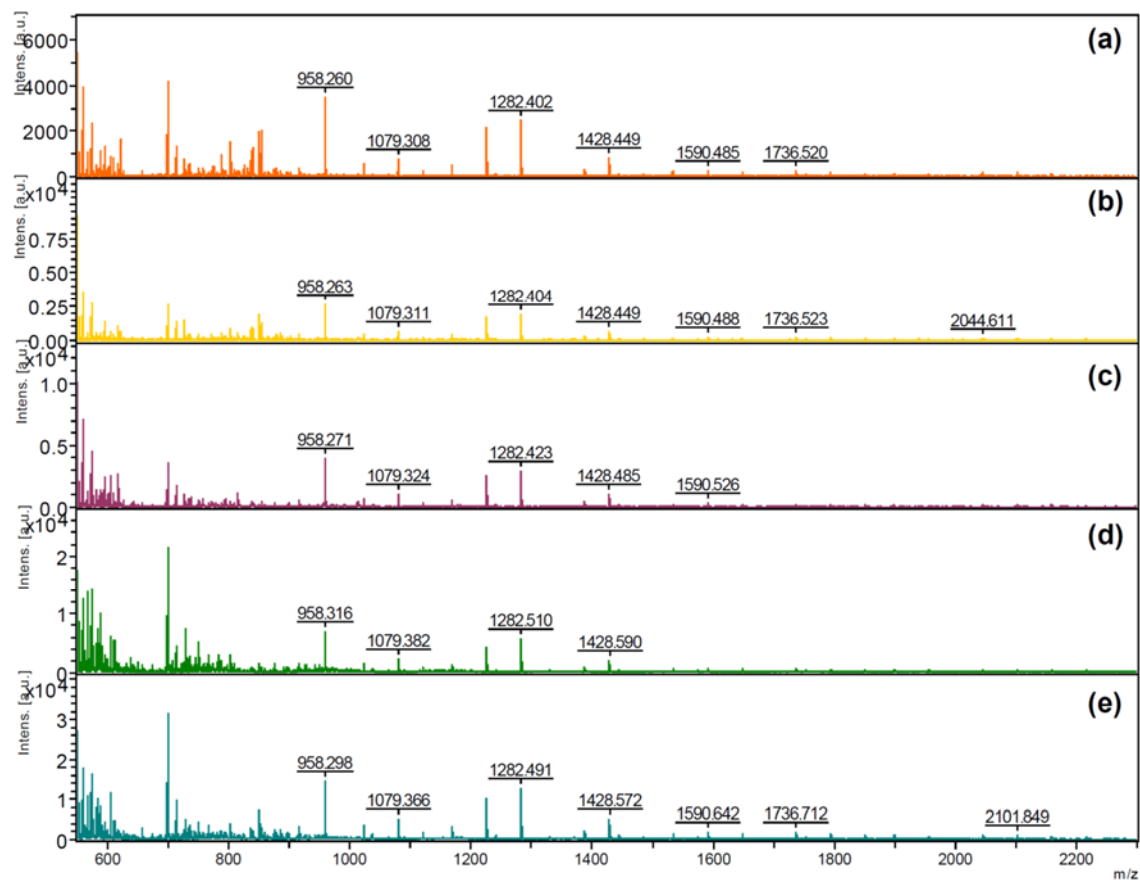

**Figure S10.** MALDI-TOFMS spectra from MPS by the workflow in Scheme 1 (with BOA/DHB/Na matrix); (a)-(e) Lot number 1-5, respectively.

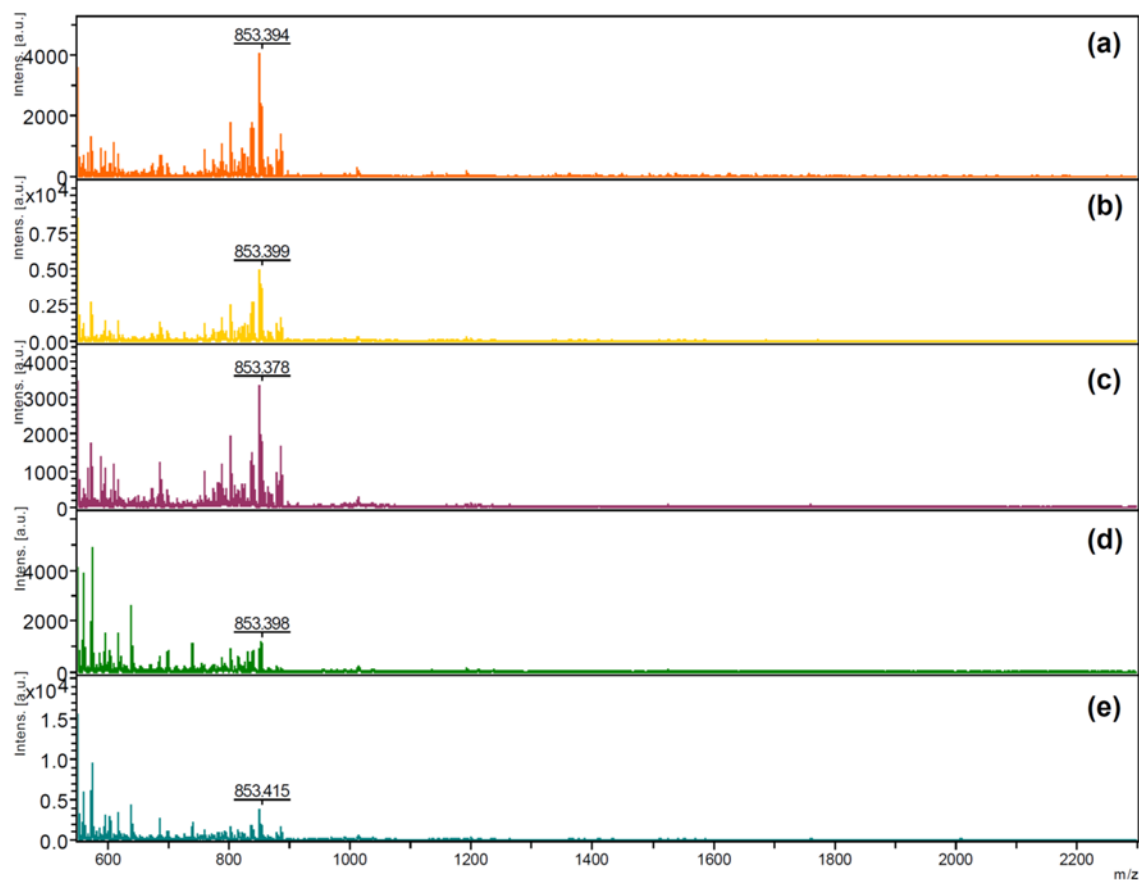

**Figure S11.** MALDI-TOFMS spectra of the Cotton HILIC eluate from MPS by the workflow in Scheme 1 with DHB Na matrix; (a)-(e) Lot number 1-5, respectively.

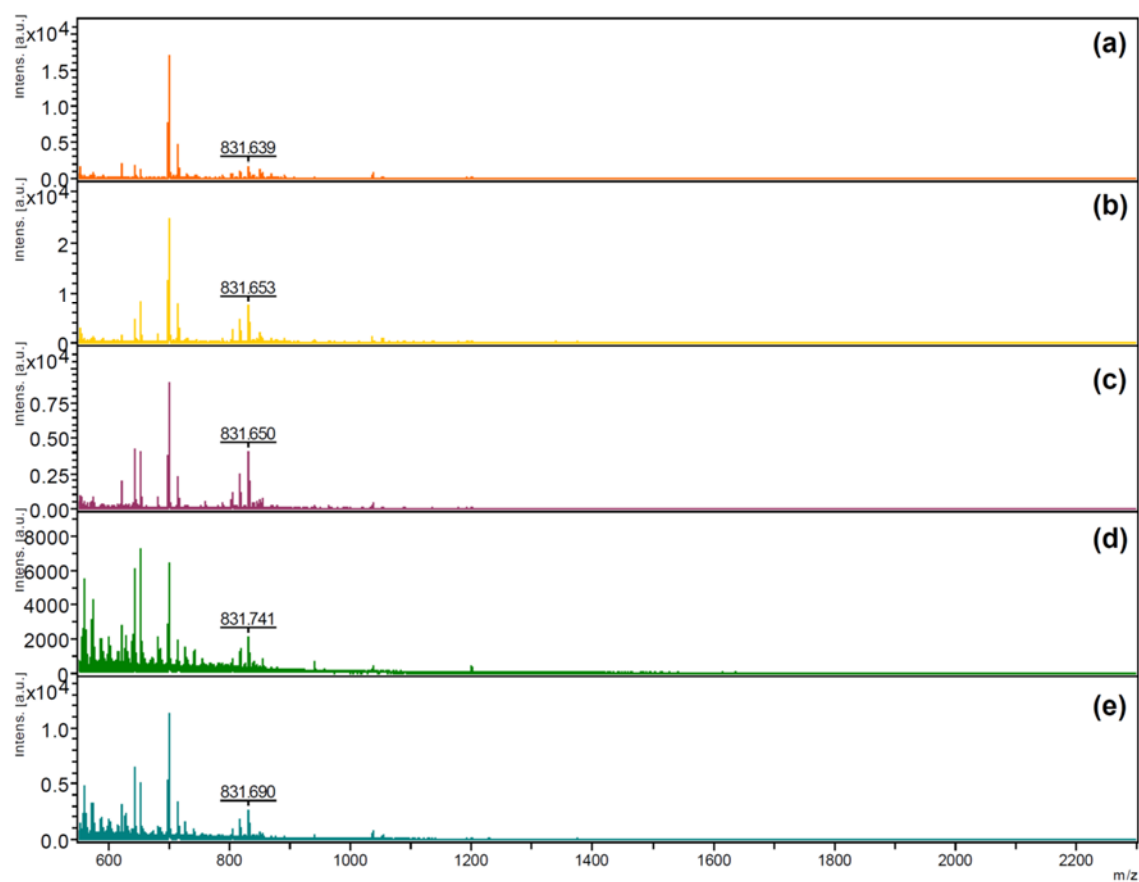

**Figure S12.** MALDI-TOFMS spectra of the Cotton HILIC eluate from MPS by the workflow in Scheme 1 with DHB TFA matrix; (a)-(e) Lot number 1-5, respectively.

**Table S1.** List of the composition of *O*-glycans assigned by GlycoMod for twenty peaks (*m/z*) detected from MPS by the workflow in Scheme 1.

| peak | <i>m/z</i> | Glycan composition                                                  |                                                                                       |
|------|------------|---------------------------------------------------------------------|---------------------------------------------------------------------------------------|
| 1    | 657.02     | (Hex) <sub>1</sub> (HexNAc) <sub>1</sub> (Deoxyhexose) <sub>1</sub> |    |
| 2    | 714.08     | (Hex) <sub>1</sub> (HexNAc) <sub>2</sub>                            |    |
| 3    | 860.21     | (Hex) <sub>1</sub> (HexNAc) <sub>2</sub> (Deoxyhexose) <sub>1</sub> |    |
| 4    | 876.22     | (Hex) <sub>2</sub> (HexNAc) <sub>2</sub>                            |    |
| 5    | 917.26     | (Hex) <sub>1</sub> (HexNAc) <sub>3</sub>                            |    |
| 6    | 1022.32    | (Hex) <sub>2</sub> (HexNAc) <sub>2</sub> (Deoxyhexose) <sub>1</sub> |    |
| 7    | 1079.36    | (Hex) <sub>2</sub> (HexNAc) <sub>3</sub>                            |    |
| 8    | 1120.39    | (Hex) <sub>1</sub> (HexNAc) <sub>4</sub>                            |  |
| 9    | 1168.41    | (Hex) <sub>2</sub> (HexNAc) <sub>2</sub> (Deoxyhexose) <sub>2</sub> |  |
| 10   | 1225.46    | (Hex) <sub>2</sub> (HexNAc) <sub>3</sub> (Deoxyhexose) <sub>1</sub> |  |
| 11   | 1282.49    | (Hex) <sub>2</sub> (HexNAc) <sub>4</sub>                            |  |
| 12   | 1387.54    | (Hex) <sub>3</sub> (HexNAc) <sub>3</sub> (Deoxyhexose) <sub>1</sub> |  |
| 13   | 1428.57    | (Hex) <sub>2</sub> (HexNAc) <sub>4</sub> (Deoxyhexose) <sub>1</sub> |  |
| 14   | 1533.61    | (Hex) <sub>3</sub> (HexNAc) <sub>3</sub> (Deoxyhexose) <sub>2</sub> |  |
| 15   | 1590.64    | (Hex) <sub>3</sub> (HexNAc) <sub>4</sub> (Deoxyhexose) <sub>1</sub> |  |
| 16   | 1647.67    | (Hex) <sub>3</sub> (HexNAc) <sub>5</sub>                            |  |
| 17   | 1736.71    | (Hex) <sub>3</sub> (HexNAc) <sub>4</sub> (Deoxyhexose) <sub>2</sub> |  |
| 18   | 1793.73    | (Hex) <sub>3</sub> (HexNAc) <sub>5</sub> (Deoxyhexose) <sub>1</sub> |  |
| 19   | 2044.83    | (Hex) <sub>4</sub> (HexNAc) <sub>4</sub> (Deoxyhexose) <sub>3</sub> |  |
| 20   | 2101.85    | (Hex) <sub>4</sub> (HexNAc) <sub>5</sub> (Deoxyhexose) <sub>2</sub> |  |

**Table S2.** Amount list of the twenty *O*-glycans from MPS detected by the workflow processing in Scheme 1.

| peak | <i>m/z</i> | pmol    |         |         |         |         | Average |
|------|------------|---------|---------|---------|---------|---------|---------|
|      |            | Lot 1   | Lot 2   | Lot 3   | Lot 4   | Lot 5   |         |
| 1    | 657.02     | -       | -       | -       | -       | 96.23   | 19.25   |
| 2    | 714.08     | 293.62  | 385.10  | 330.33  | 427.59  | 474.70  | 382.27  |
| 3    | 860.21     | -       | -       | -       | -       | 70.79   | 14.16   |
| 4    | 876.22     | 77.67   | -       | -       | -       | 128.23  | 41.18   |
| 5    | 917.26     | 101.31  | 126.65  | 121.93  | 144.27  | 175.75  | 133.98  |
| 6    | 1022.32    | 143.24  | 163.59  | 138.41  | 173.46  | 223.02  | 168.34  |
| 7    | 1079.36    | 241.29  | 245.97  | 268.32  | 285.31  | 360.75  | 280.33  |
| 8    | 1120.39    | -       | -       | -       | -       | 136.71  | 27.34   |
| 9    | 1168.41    | 193.49  | 243.31  | 233.40  | 365.47  | 299.97  | 267.13  |
| 10   | 1225.46    | 806.10  | 838.20  | 806.05  | 772.65  | 957.57  | 836.12  |
| 11   | 1282.49    | 1021.99 | 1044.58 | 1000.62 | 1130.32 | 1265.48 | 1092.60 |
| 12   | 1387.54    | 132.97  | 188.16  | 244.16  | 208.71  | 158.12  | 186.42  |
| 13   | 1428.57    | 364.05  | 390.53  | 427.39  | 476.72  | 559.95  | 443.73  |
| 14   | 1533.61    | -       | -       | -       | 155.55  | 165.84  | 64.28   |
| 15   | 1590.64    | 154.75  | 143.96  | 179.99  | 189.28  | 215.96  | 176.79  |
| 16   | 1647.67    | -       | 123.87  | -       | 168.38  | 172.65  | 92.98   |
| 17   | 1736.71    | 176.50  | 176.44  | -       | 191.02  | 237.00  | 156.19  |
| 18   | 1793.73    | -       | -       | -       | 175.22  | 203.67  | 75.78   |
| 19   | 2044.83    | -       | 142.32  | -       | 141.28  | 180.18  | 92.76   |
| 20   | 2101.85    | -       | 118.74  | -       | 176.63  | 179.09  | 94.89   |
